## CORRECTION

## Correction: Estimating emergency department crowding with stochastic population models

The *PLOS ONE* Staff

## Notice of republication

This article was republished on May 1, 2024, to correct errors in equations that were introduced during the typesetting process. The publisher apologizes for the errors. Please download the article again to view the corrected version. Both the originally published, uncorrected article and the republished, corrected version are provided here for reference.

## Supporting information

**S1 File. Originally published, uncorrected article.**

(PDF)

**S2 File. Republished, corrected article.**

(PDF)

## Reference

1. Parnass G, Levzion-Korach O, Peres R, Assaf M (2023) Estimating emergency department crowding with stochastic population models. *PLoS ONE* 18(12): e0295130. <https://doi.org/10.1371/journal.pone.0295130>. PMID: 38039309

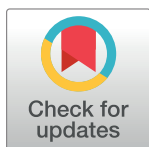

## OPEN ACCESS

**Citation:** The *PLOS ONE* Staff (2024) Correction: Estimating emergency department crowding with stochastic population models. *PLoS ONE* 19(5): e0304152. <https://doi.org/10.1371/journal.pone.0304152>

**Published:** May 16, 2024

**Copyright:** © 2024 The PLOS ONE Staff. This is an open access article distributed under the terms of the [Creative Commons Attribution License](https://creativecommons.org/licenses/by/4.0/), which permits unrestricted use, distribution, and reproduction in any medium, provided the original author and source are credited.
